# Supplementary material for: A Combined microRNA and Chemokine Profile in Urine to Identify Rejection After Kidney Transplantation
Source: PubMed Central journal article supplement — Transplant Direct. 2021 Jun 10;7(7):e711. doi: 10.1097/TXD.0000000000001169 (PMC8196093; doi:10.1097/txd.0000000000001169), 2021-06-10
Supplement: txd-7-e711-s001.pdf [file txd-7-e711-s001.pdf]

## Supplemental Digital Content

**Figure S1.** Raw data of miR expression profiling in renal biopsies (A) and urine sediments (B). Inter-plate corrected Cq values are shown, median miR Cq values (used for normalization) are displayed with red lines. AR: acute rejection. C: controls (no rejection).

**Figure S2.** Marker levels are not dependent on proteinuria and eGFR. (A) Subgroups of rejection and no-rejection were compared for patients having similar urinary protein level (left panel) or having similar eGFR (right panel). Significant differences for marker levels were still found between rejection and no-rejection. (B) Correlation plots (spearman rank tests) of eGFR with marker levels within the total no-rejection group (upper panel) or within the rejection group (lower panel). No significant correlations were found, except CXCL-9 versus eGFR, which showed a weak rho correlation coefficient. (C) In the whole group, urine CXCL-9 protein concentrations correlated highly with CXCL-9 protein levels that had been corrected for urinary creatinine excretion, showing minimal effect of urinary output on biomarker levels.

**Figure S3.** MiR- and CXCL-9 levels in according to rejection severity. Medians with 95% confidence interval are shown. Sample sizes (TCMR / AMR / mixed) are 81 / 10

/ 7 for miRs and 88 / 13 / 7 for CXCL-9. TCMR: T-cell-mediated rejection. AMR: antibody-mediated rejection.

**Figure S4.** Expression of miRs in urine sediments of recipients with rejection, BKVN infection or CMV infection. Scatter plots of relative miR expression levels are shown on a logarithmic scale. Medians are presented by horizontal lines. Within the BKV group, samples collected at the Leiden University Medical Center are presented as filled dots and samples collected at the Radboud University Medical Center are presented as open circles. Differences were tested by Mann-Whitney U tests. \* indicates  $P < 0.001$ .

**Table S1.** MiR expression profiling in renal biopsies <sup>1</sup>

| <b>MicroRNA</b>  | <b>Rej vs. No-rej</b> | <b>MWU</b> | <b>FDR</b> |
|------------------|-----------------------|------------|------------|
| hsa-miR-155-5p   | 6.20                  | 0.001      | 0.254      |
| hsa-miR-142-3p   | 4.79                  | 0.001      | 0.127      |
| hsa-miR-21-5p    | 2.94                  | 0.002      | 0.169      |
| hsa-miR-615-3p   | 0.46                  | 0.002      | 0.127      |
| hsa-miR-150-5p   | 5.27                  | 0.003      | 0.152      |
| hsa-miR-192-5p   | 0.55                  | 0.003      | 0.127      |
| hsa-miR-378a-3p  | 0.49                  | 0.004      | 0.145      |
| hsa-miR-29b-2-5p | 0.40                  | 0.004      | 0.127      |
| hsa-miR-124-3p   | 0.22                  | 0.004      | 0.113      |
| hsa-miR-146b-5p  | 2.47                  | 0.004      | 0.102      |
| hsa-miR-29c-5p   | 0.28                  | 0.004      | 0.092      |
| hsa-miR-142-5p   | 3.47                  | 0.004      | 0.085      |
| hsa-miR-193b-3p  | 0.47                  | 0.005      | 0.098      |
| hsa-miR-223-3p   | 3.98                  | 0.005      | 0.091      |
| hsa-miR-188-5p   | 0.44                  | 0.005      | 0.085      |
| hsa-miR-30d-5p   | 0.63                  | 0.008      | 0.127      |
| hsa-miR-874      | 0.26                  | 0.008      | 0.120      |
| hsa-miR-22-3p    | 0.32                  | 0.008      | 0.113      |
| hsa-miR-148a-3p  | 0.56                  | 0.008      | 0.107      |
| hsa-miR-215      | 0.73                  | 0.009      | 0.114      |
| hsa-miR-30c-5p   | 0.54                  | 0.011      | 0.133      |
| hsa-miR-130a-3p  | 0.29                  | 0.011      | 0.127      |
| hsa-miR-491-5p   | 0.68                  | 0.011      | 0.121      |
| hsa-miR-18b-5p   | 1.33                  | 0.011      | 0.116      |
| hsa-let-7c       | 0.59                  | 0.011      | 0.112      |
| hsa-miR-365a-3p  | 0.62                  | 0.011      | 0.107      |
| hsa-miR-30c-2-3p | 0.34                  | 0.011      | 0.103      |
| hsa-miR-378a-5p  | 0.39                  | 0.011      | 0.100      |
| hsa-miR-221-3p   | 0.59                  | 0.015      | 0.131      |
| hsa-miR-500a-5p  | 0.69                  | 0.015      | 0.127      |
| hsa-miR-126-3p   | 0.68                  | 0.015      | 0.123      |
| hsa-miR-940      | 0.52                  | 0.015      | 0.119      |
| hsa-miR-187-3p   | 0.38                  | 0.015      | 0.115      |
| hsa-miR-107      | 0.51                  | 0.015      | 0.112      |
| hsa-miR-29c-3p   | 0.58                  | 0.015      | 0.109      |
| hsa-let-7d-5p    | 0.60                  | 0.015      | 0.106      |
| hsa-miR-145-5p   | 0.49                  | 0.015      | 0.103      |
| hsa-miR-502-5p   | 0.33                  | 0.015      | 0.100      |
| hsa-miR-27b-3p   | 0.74                  | 0.015      | 0.098      |
| hsa-miR-193b-5p  | 0.31                  | 0.015      | 0.095      |
| hsa-miR-190a     | 0.26                  | 0.015      | 0.093      |
| hsa-miR-342-5p   | 1.63                  | 0.018      | 0.109      |

|                 |      |       |       |
|-----------------|------|-------|-------|
| hsa-miR-887     | 0.65 | 0.018 | 0.106 |
| hsa-miR-7-1-3p  | 3.71 | 0.020 | 0.115 |
| hsa-miR-194-5p  | 0.68 | 0.021 | 0.119 |
| hsa-miR-362-5p  | 0.62 | 0.021 | 0.116 |
| hsa-miR-199a-5p | 0.40 | 0.021 | 0.113 |
| hsa-miR-26b-3p  | 0.76 | 0.021 | 0.111 |
| hsa-miR-99a-3p  | 0.26 | 0.021 | 0.109 |
| hsa-miR-101-5p  | 0.16 | 0.021 | 0.107 |
| hsa-miR-338-3p  | 0.39 | 0.024 | 0.120 |
| hsa-miR-98-5p   | 0.49 | 0.028 | 0.137 |
| hsa-miR-204-5p  | 0.61 | 0.028 | 0.134 |
| hsa-miR-324-5p  | 0.71 | 0.028 | 0.132 |
| hsa-miR-214-3p  | 0.51 | 0.028 | 0.129 |
| hsa-miR-324-3p  | 0.62 | 0.028 | 0.127 |
| hsa-miR-744-5p  | 0.56 | 0.028 | 0.125 |
| hsa-let-7a-5p   | 0.47 | 0.028 | 0.123 |
| hsa-miR-532-3p  | 0.64 | 0.028 | 0.121 |
| hsa-let-7e-5p   | 0.57 | 0.028 | 0.119 |
| hsa-miR-106b-3p | 0.47 | 0.028 | 0.117 |
| hsa-miR-143-3p  | 0.61 | 0.037 | 0.152 |
| hsa-miR-141-3p  | 0.80 | 0.037 | 0.149 |
| hsa-miR-342-3p  | 1.93 | 0.037 | 0.147 |
| hsa-miR-196a-5p | 0.64 | 0.037 | 0.145 |
| hsa-miR-29b-3p  | 0.47 | 0.037 | 0.142 |
| hsa-miR-30b-5p  | 0.59 | 0.037 | 0.140 |
| hsa-miR-135a-5p | 0.62 | 0.037 | 0.138 |
| hsa-miR-424-3p  | 0.57 | 0.037 | 0.136 |
| hsa-miR-149-5p  | 0.58 | 0.037 | 0.134 |
| hsa-let-7e-3p   | 0.59 | 0.037 | 0.132 |
| hsa-miR-1247-5p | 0.53 | 0.037 | 0.131 |
| hsa-miR-551b-3p | 0.21 | 0.037 | 0.129 |
| hsa-miR-431-5p  | 0.43 | 0.037 | 0.127 |
| hsa-miR-29a-3p  | 0.65 | 0.043 | 0.146 |
| hsa-miR-99b-3p  | 0.60 | 0.043 | 0.144 |
| hsa-miR-497-5p  | 0.35 | 0.049 | 0.162 |
| hsa-miR-133a    | 0.32 | 0.049 | 0.160 |
| hsa-miR-128     | 0.74 | 0.049 | 0.158 |
| hsa-miR-151a-5p | 0.68 | 0.049 | 0.156 |
| hsa-miR-139-5p  | 0.59 | 0.049 | 0.154 |
| hsa-miR-502-3p  | 0.60 | 0.049 | 0.152 |
| hsa-miR-1972    | 1.82 | 0.049 | 0.150 |
| hsa-miR-133b    | 0.53 | 0.049 | 0.148 |
| hsa-miR-188-3p  | 0.35 | 0.049 | 0.146 |

<sup>1</sup> The second column shows fold change differences between rejection- and no-rejection group. MWU column shows P values of the Mann-Whitney U test. FDR column shows P values after correction for multiple comparisons by false discovery rate approach.

**Table S2.** MiR expression profiling in urine sediments <sup>1</sup>

| <b>MicroRNA</b>   | <b>Rej vs. No-rej</b> | <b>MWU</b> | <b>FDR</b> |
|-------------------|-----------------------|------------|------------|
| hsa-miR-92b-5p    | 2.97                  | 0.001      | 0.568      |
| hsa-miR-296-3p    | 6.18                  | 0.006      | 1.704      |
| hsa-miR-20b-5p    | 3.02                  | 0.012      | 2.272      |
| hsa-miR-95        | 0.23                  | 0.012      | 1.704      |
| hsa-mir-1908      | 15.48                 | 0.012      | 1.363      |
| hsa-miR-221-5p    | 0.25                  | 0.016      | 1.515      |
| hsa-miR-34b-5p    | 0.27                  | 0.016      | 1.298      |
| hsa-miR-200c-5p   | 0.30                  | 0.016      | 1.136      |
| hsa-mir-203a      | 0.13                  | 0.021      | 1.325      |
| hsa-miR-33a-3p    | 0.33                  | 0.021      | 1.193      |
| hsa-miR-153       | 0.04                  | 0.021      | 1.084      |
| hsa-miR-224-5p    | 0.28                  | 0.024      | 1.136      |
| hsa-miR-25-3p     | 3.09                  | 0.027      | 1.180      |
| hsa-miR-141-3p    | 0.29                  | 0.027      | 1.095      |
| hsa-miR-126-5p    | 9.85                  | 0.027      | 1.022      |
| hsa-mir-147a      | 0.23                  | 0.027      | 0.959      |
| hsa-mir-184       | 0.15                  | 0.027      | 0.902      |
| hsa-miR-125b-2-3p | 0.23                  | 0.027      | 0.852      |
| hsa-miR-452-5p    | 0.21                  | 0.036      | 1.076      |
| has-miR-615-3p    | 0.60                  | 0.036      | 1.022      |
| hsa-mir-375       | 0.22                  | 0.036      | 0.974      |
| hsa-miR-708-5p    | 0.41                  | 0.036      | 0.929      |
| hsa-miR-126-3p    | 6.97                  | 0.036      | 0.889      |
| hsa-miR-410       | 3.06                  | 0.036      | 0.852      |
| hsa-miR-149-5p    | 0.44                  | 0.036      | 0.818      |
| hsa-miR-486-3p    | 8.82                  | 0.036      | 0.786      |
| hsa-mir-451a      | 9.82                  | 0.046      | 0.968      |
| has-miR-195-3p    | 1.96                  | 0.046      | 0.933      |
| hsa-miR-1237-3p   | 0.21                  | 0.046      | 0.901      |
| hsa-miR-891a      | 3.13                  | 0.046      | 0.871      |
| hsa-miR-573       | 0.35                  | 0.046      | 0.843      |

<sup>1</sup> The second column shows fold change differences between rejection- and no-rejection group. MWU column shows P values of the Mann-Whitney U test. FDR column shows P values after correction for multiple comparisons by false discovery rate approach.

**Table S3.** The rationale for the selection of miRs studied in the independent cohort of urines.

| <b>MicroRNA</b> | <b>Rationale</b>                                                           |
|-----------------|----------------------------------------------------------------------------|
| miR-92b-5p      | Increased during rejection in urines.                                      |
| miR-296-3p      | Increased during rejection in urines.                                      |
| miR-25-3p       | Increased during rejection in urines.                                      |
| miR-203a        | Decreased during rejection in urines.                                      |
| miR-224-5p      | Decreased during rejection in urines.                                      |
| miR-149-5p      | Decreased during rejection in both biopsies and urines.                    |
| miR-141-3p      | Decreased during rejection in both biopsies and urines.                    |
| miR-615-3p      | Decreased during rejection in both biopsies and urines.                    |
| miR-126-3p      | Decreased during rejection in biopsies, but increased in urines.           |
| miR-210-3p      | Shown to be decreased in urine in previous study [9].                      |
| miR-155-5p      | Increased in rejection biopsies. Shown in previous biopsy studies [5, 22]. |
| miR-142-3p      | Increased in rejection biopsies. Shown in previous biopsy studies [5, 22]. |
| miR-21-5p       | Increased in rejection biopsies. Shown in previous biopsy studies [5, 22]. |
| miR-142-5p      | Increased in rejection biopsies. Shown in previous biopsy studies [5, 22]. |
| miR-223-3p      | Increased in rejection biopsies. Shown in previous biopsy studies [5, 22]. |
